# Supplementary material for: Comparative Study of Salivary, Duodenal, and Fecal Microbiota Composition Across Adult Celiac Disease
Source: MDPI journal article supplement (doi:10.3390/jcm9041109), 2020-04-13
Supplement: s1 [file s1]

**Supplemental Table 2.  $\alpha$ -diversity indices for each sample**

| SampleID    | Sample | Group | Observed Richness | Chao1  | Shannon |
|-------------|--------|-------|-------------------|--------|---------|
| 42565F3956  | mucosa | A     | 84                | 101    | 3,32    |
| 42567F3956  | mucosa | A     | 74                | 112,5  | 0,65    |
| 66257F6172  | mucosa | A     | 95                | 182,35 | 3,2     |
| 66258F6172  | mucosa | A     | 15                | 106    | 2,64    |
| 66261F6173  | mucosa | A     | 344               | 432,02 | 3,69    |
| 66264F6173  | mucosa | A     | 118               | 278,91 | 3,88    |
| 66268F6173  | mucosa | A     | 66                | 105    | 1,56    |
| 66270F6174  | mucosa | A     | 28                | 97     | 3,27    |
| 92072F7971  | mucosa | A     | 338               | 494,42 | 4,65    |
| 92074F7971  | mucosa | A     | 306               | 415,45 | 3,76    |
| 92082F7972  | mucosa | A     | 272               | 451,15 | 3,2     |
| 92088F7973  | mucosa | A     | 240               | 378,49 | 4,53    |
| 136251F1290 | mucosa | C     | 271               | 410,47 | 1,9     |
| 136252F1290 | mucosa | C     | 334               | 455,23 | 4,31    |
| 136253F1290 | mucosa | C     | 430               | 585,82 | 4,43    |
| 136254F1290 | mucosa | C     | 352               | 482,78 | 3,58    |
| 136255F1290 | mucosa | C     | 305               | 410    | 3,8     |
| 159064F1530 | mucosa | C     | 87                | 168,67 | 4,17    |
| 159065F1530 | mucosa | C     | 86                | 142    | 4,02    |
| 159066F1530 | mucosa | C     | 341               | 470,49 | 4       |
| 159067F1530 | mucosa | C     | 373               | 533,53 | 3,29    |
| 159068F1530 | mucosa | C     | 181               | 269,77 | 3,51    |
| 159069F1530 | mucosa | C     | 371               | 433,35 | 4,06    |
| 42568F3956  | mucosa | C     | 212               | 257,32 | 3,84    |
| 42570F3957  | mucosa | C     | 254               | 311,4  | 4,18    |
| 42573F3957  | mucosa | C     | 260               | 333,2  | 3,51    |
| 42579F3957  | mucosa | C     | 236               | 293,95 | 4,26    |
| 42581F3958  | mucosa | C     | 318               | 353,36 | 4,14    |
| 42583F3958  | mucosa | C     | 204               | 238,44 | 3,98    |
| 66266F6173  | mucosa | C     | 12                | 27     | 2,44    |
| 92065F7970  | mucosa | C     | 127               | 289    | 4,3     |
| 92067F7971  | mucosa | C     | 372               | 502,02 | 3,57    |
| 92075F7971  | mucosa | C     | 294               | 354,67 | 4,58    |
| 92076F7971  | mucosa | C     | 233               | 409,13 | 3,82    |
| 92077F7972  | mucosa | C     | 192               | 313,36 | 4,22    |
| 92081F7972  | mucosa | C     | 141               | 218,9  | 4       |
| 92084F7972  | mucosa | C     | 248               | 522,68 | 4,19    |
| 92086F7972  | mucosa | C     | 494               | 740,5  | 4,94    |
| 92087F7973  | mucosa | C     | 292               | 456,92 | 4,61    |
| 136261F1290 | mucosa | P     | 294               | 415,73 | 4       |
| 42582F3958  | mucosa | P     | 333               | 398,81 | 4,51    |
| 66259F6173  | mucosa | P     | 370               | 451,33 | 3,9     |
| 92069F7971  | mucosa | P     | 354               | 468,49 | 4,61    |

|             |        |   |      |         |      |
|-------------|--------|---|------|---------|------|
| 92070F7971  | mucosa | P | 350  | 518,49  | 3,83 |
| 159071F1530 | mucosa | R | 370  | 475,39  | 3,95 |
| 42566F3956  | mucosa | R | 198  | 228     | 3,19 |
| 42572F3957  | mucosa | R | 222  | 277     | 3,84 |
| 92073F7971  | mucosa | R | 296  | 409,14  | 3,32 |
| 92078F7972  | mucosa | R | 307  | 453,39  | 4,18 |
| 136256F1290 | mucosa | T | 159  | 252,72  | 4,68 |
| 136257F1290 | mucosa | T | 286  | 406,66  | 4,05 |
| 136258F1290 | mucosa | T | 447  | 588,08  | 4,18 |
| 136259F1290 | mucosa | T | 417  | 584,19  | 4,98 |
| 136260F1290 | mucosa | T | 406  | 553,42  | 4,51 |
| 159070F1530 | mucosa | T | 401  | 488,55  | 3,76 |
| 42569F3956  | mucosa | T | 265  | 314,04  | 3,7  |
| 42571F3957  | mucosa | T | 141  | 156,81  | 3,82 |
| 42574F3957  | mucosa | T | 269  | 345,96  | 3,55 |
| 42576F3957  | mucosa | T | 335  | 396,57  | 3,86 |
| 42578F3957  | mucosa | T | 107  | 122,55  | 3,93 |
| 42580F3958  | mucosa | T | 228  | 300,06  | 3,98 |
| 42584F3958  | mucosa | T | 321  | 405     | 3,7  |
| 66260F6173  | mucosa | T | 320  | 393,24  | 3,55 |
| 66262F6173  | mucosa | T | 304  | 420,73  | 3,56 |
| 66263F6173  | mucosa | T | 282  | 369,26  | 2,91 |
| 66265F6173  | mucosa | T | 26   | 83,75   | 3,16 |
| 66267F6173  | mucosa | T | 56   | 126     | 3,67 |
| 66269F6174  | mucosa | T | 169  | 248,8   | 3,72 |
| 66296F6176  | mucosa | T | 344  | 462,7   | 3,97 |
| 92064F7970  | mucosa | T | 253  | 333,1   | 4,1  |
| 92066F7970  | mucosa | T | 383  | 558,66  | 4,31 |
| 92068F7971  | mucosa | T | 381  | 520,09  | 3,98 |
| 92071F7971  | mucosa | T | 255  | 342,02  | 3,6  |
| 92079F7972  | mucosa | T | 395  | 617,82  | 4,43 |
| 92080F7972  | mucosa | T | 296  | 464,81  | 3,88 |
| 92085F7972  | mucosa | T | 303  | 429,04  | 4,86 |
| 92089F7973  | mucosa | T | 254  | 380,67  | 4,27 |
| 42534F3952  | stool  | A | 302  | 450,17  | 3,12 |
| 42536F3952  | stool  | A | 555  | 822,5   | 3,96 |
| 66271F6174  | stool  | A | 910  | 1204,05 | 4,44 |
| 66273F6174  | stool  | A | 787  | 1109,88 | 4,82 |
| 66276F6174  | stool  | A | 1275 | 1576,34 | 5,31 |
| 66278F6174  | stool  | A | 982  | 1425,31 | 4,2  |
| 66284F6175  | stool  | A | 912  | 1222,04 | 4,83 |
| 66286F6175  | stool  | A | 1118 | 1483,45 | 4,96 |
| 66288F6175  | stool  | A | 823  | 1163,18 | 4,53 |
| 66290F6176  | stool  | A | 500  | 776,39  | 3,97 |
| 92031F7967  | stool  | A | 1175 | 1526,15 | 4,43 |
| 92032F7967  | stool  | A | 576  | 890,53  | 3,63 |
| 136262F1290 | stool  | C | 843  | 1232,89 | 4,51 |
| 136263F1290 | stool  | C | 634  | 860,14  | 4,07 |
| 136264F1290 | stool  | C | 682  | 1024,35 | 3,84 |
| 159053F1530 | stool  | C | 693  | 953,44  | 4,06 |

|             |        |   |      |         |      |
|-------------|--------|---|------|---------|------|
| 159054F1530 | stool  | C | 713  | 1028,16 | 4,39 |
| 159055F1530 | stool  | C | 1036 | 1303,52 | 4,57 |
| 42537F3952  | stool  | C | 173  | 273,04  | 3,98 |
| 42539F3953  | stool  | C | 358  | 580,47  | 3,29 |
| 42545F3954  | stool  | C | 409  | 617,5   | 3,83 |
| 66281F6175  | stool  | C | 874  | 1129,01 | 3,97 |
| 66283F6175  | stool  | C | 415  | 641,62  | 0,5  |
| 66292F6176  | stool  | C | 66   | 91,67   | 2,57 |
| 66293F6176  | stool  | C | 722  | 1059,25 | 3,98 |
| 92026F7966  | stool  | C | 622  | 970,43  | 3,03 |
| 92027F7967  | stool  | C | 856  | 1206,24 | 4,28 |
| 92033F7967  | stool  | C | 734  | 1099,05 | 4,4  |
| 92036F7967  | stool  | C | 307  | 514,24  | 3,36 |
| 92038F7968  | stool  | C | 688  | 1065,48 | 3,07 |
| 66275F6174  | stool  | P | 1080 | 1439,03 | 4,05 |
| 66294F6176  | stool  | P | 615  | 947,28  | 4,21 |
| 92029F7967  | stool  | P | 571  | 825,43  | 3,68 |
| 42535F3952  | stool  | R | 503  | 666,38  | 4,11 |
| 42540F3953  | stool  | R | 711  | 930,03  | 3,56 |
| 136265F1290 | stool  | T | 932  | 1291,78 | 4,6  |
| 42538F3953  | stool  | T | 508  | 703,64  | 3,98 |
| 42541F3953  | stool  | T | 290  | 416,48  | 3,33 |
| 42542F3953  | stool  | T | 287  | 452,51  | 4,44 |
| 42544F3954  | stool  | T | 469  | 718,56  | 3,95 |
| 66272F6174  | stool  | T | 859  | 1192,29 | 4,19 |
| 66274F6174  | stool  | T | 612  | 942,37  | 4,5  |
| 66277F6174  | stool  | T | 1007 | 1348,26 | 4,15 |
| 66279F6175  | stool  | T | 1105 | 1456,75 | 4,77 |
| 66280F6175  | stool  | T | 755  | 1015,16 | 4,4  |
| 66282F6175  | stool  | T | 824  | 1235,21 | 4,48 |
| 66285F6175  | stool  | T | 853  | 1162,4  | 4,65 |
| 66287F6175  | stool  | T | 1060 | 1346,35 | 4,75 |
| 66289F6176  | stool  | T | 707  | 1027,91 | 4,54 |
| 66291F6176  | stool  | T | 705  | 985,84  | 4,14 |
| 66295F6176  | stool  | T | 710  | 1018,9  | 4,36 |
| 92025F7966  | stool  | T | 652  | 1007,44 | 3,89 |
| 92028F7967  | stool  | T | 739  | 1043,17 | 4,32 |
| 92030F7967  | stool  | T | 606  | 847,68  | 3,65 |
| 92034F7967  | stool  | T | 816  | 1141,25 | 3,93 |
| 92037F7968  | stool  | T | 1161 | 1551,28 | 4,8  |
| 42546F3954  | saliva | A | 294  | 360,28  | 2,72 |
| 42548F3954  | saliva | A | 379  | 417,52  | 3,77 |
| 66239F6171  | saliva | A | 414  | 505,02  | 3,17 |
| 66241F6171  | saliva | A | 503  | 690,2   | 3,35 |
| 66245F6171  | saliva | A | 401  | 482,43  | 3,4  |
| 66249F6172  | saliva | A | 248  | 287,33  | 3,02 |
| 66252F6172  | saliva | A | 265  | 356,5   | 3,54 |
| 66254F6172  | saliva | A | 391  | 490,02  | 3,75 |
| 66256F6172  | saliva | A | 269  | 361,12  | 3,22 |
| 92046F7968  | saliva | A | 391  | 521,8   | 3,36 |

|             |        |   |     |        |      |
|-------------|--------|---|-----|--------|------|
| 92047F7969  | saliva | A | 540 | 651,02 | 4,2  |
| 92048F7969  | saliva | A | 302 | 389,26 | 3,54 |
| 92061F7970  | saliva | A | 406 | 519,75 | 4,06 |
| 92063F7970  | saliva | A | 445 | 558,56 | 4,12 |
| 136266F1290 | saliva | C | 138 | 166,33 | 2,86 |
| 136267F1290 | saliva | C | 305 | 444,44 | 3,46 |
| 136268F1290 | saliva | C | 371 | 530    | 3,31 |
| 136269F1290 | saliva | C | 307 | 394,6  | 3,51 |
| 159058F1530 | saliva | C | 296 | 417,54 | 3,77 |
| 159059F1530 | saliva | C | 397 | 529,26 | 4,03 |
| 159060F1530 | saliva | C | 417 | 546,5  | 4,15 |
| 159061F1530 | saliva | C | 442 | 559,86 | 3,72 |
| 42549F3954  | saliva | C | 297 | 358,39 | 3,65 |
| 42551F3955  | saliva | C | 398 | 456,18 | 3,94 |
| 42554F3955  | saliva | C | 213 | 237,41 | 2,91 |
| 42560F3955  | saliva | C | 400 | 491,24 | 4,1  |
| 42562F3956  | saliva | C | 416 | 501,13 | 3,81 |
| 42564F3956  | saliva | C | 429 | 482,2  | 3,63 |
| 66251F6172  | saliva | C | 352 | 459,06 | 2,78 |
| 92040F7968  | saliva | C | 337 | 428,74 | 3,94 |
| 92042F7968  | saliva | C | 384 | 465,16 | 3,51 |
| 92049F7969  | saliva | C | 406 | 589,86 | 3,36 |
| 92050F7969  | saliva | C | 282 | 383,79 | 3,44 |
| 92051F7969  | saliva | C | 439 | 602,88 | 3,88 |
| 92055F7969  | saliva | C | 292 | 385,37 | 3,88 |
| 92057F7970  | saliva | C | 313 | 388    | 3,47 |
| 92059F7970  | saliva | C | 426 | 530,07 | 3,84 |
| 92060F7970  | saliva | C | 330 | 421,74 | 3,88 |
| 136275F1290 | saliva | P | 400 | 513,17 | 3,29 |
| 42563F3956  | saliva | P | 444 | 559,62 | 3,79 |
| 66243F6171  | saliva | P | 357 | 432,35 | 3,64 |
| 92044F7968  | saliva | P | 312 | 423,89 | 3,56 |
| 159063F1530 | saliva | R | 342 | 445,64 | 2,54 |
| 42547F3954  | saliva | R | 198 | 240    | 2,57 |
| 42553F3955  | saliva | R | 250 | 309,29 | 3,37 |
| 92052F7969  | saliva | R | 273 | 344    | 3,84 |
| 136270F1290 | saliva | T | 284 | 370,06 | 3,2  |
| 136271F1290 | saliva | T | 374 | 438,77 | 3,8  |
| 136272F1290 | saliva | T | 424 | 507,08 | 4,1  |
| 136273F1290 | saliva | T | 415 | 510,07 | 3,87 |
| 136274F1290 | saliva | T | 449 | 599,8  | 3,84 |
| 159062F1530 | saliva | T | 341 | 462,87 | 3,72 |
| 42550F3954  | saliva | T | 414 | 493,23 | 3,27 |
| 42552F3955  | saliva | T | 262 | 315,1  | 2,55 |
| 42555F3955  | saliva | T | 277 | 337,38 | 3,24 |
| 42557F3955  | saliva | T | 414 | 466,13 | 3,58 |
| 42559F3955  | saliva | T | 297 | 382,04 | 3,87 |
| 42561F3956  | saliva | T | 342 | 477,03 | 3,32 |
| 42588F3956  | saliva | T | 431 | 508,34 | 3,08 |
| 66240F6171  | saliva | T | 394 | 521,57 | 4,01 |

|            |        |   |     |        |      |
|------------|--------|---|-----|--------|------|
| 66242F6171 | saliva | T | 324 | 416,94 | 3,73 |
| 66244F6171 | saliva | T | 339 | 481,6  | 3,24 |
| 66246F6171 | saliva | T | 359 | 452,95 | 4,03 |
| 66247F6171 | saliva | T | 341 | 418    | 3,75 |
| 66248F6171 | saliva | T | 245 | 322,66 | 2,7  |
| 66250F6172 | saliva | T | 392 | 505,17 | 3,91 |
| 66253F6172 | saliva | T | 353 | 423,29 | 3,59 |
| 66255F6172 | saliva | T | 371 | 480,44 | 3,76 |
| 92039F7968 | saliva | T | 411 | 525,47 | 3,55 |
| 92041F7968 | saliva | T | 339 | 457,83 | 4,1  |
| 92043F7968 | saliva | T | 441 | 581,93 | 3,86 |
| 92045F7968 | saliva | T | 283 | 406,1  | 3,15 |
| 92053F7969 | saliva | T | 377 | 477,09 | 4,26 |
| 92054F7969 | saliva | T | 320 | 383,07 | 3,3  |
| 92058F7970 | saliva | T | 435 | 519,06 | 3,9  |
| 92062F7970 | saliva | T | 481 | 592,2  | 4,31 |

*A: active coeliac disease; C: controls; P: potential coeliac disease;  
R: refractory coeliac disease; T: treated coeliac disease.*
